# Supplementary material
Source: PubMed Central journal article supplement (PMC3086313)
Supplement: NIHMS280109-supplement-3.pdf [file NIHMS280109-supplement-3.pdf]

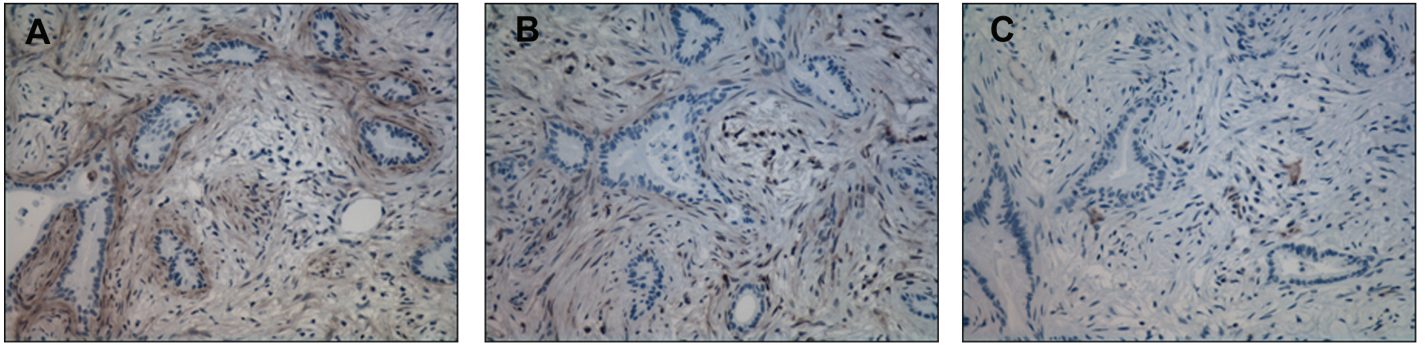

Supplemental Figure 1. Immunohistochemical staining of human PDAC metastasis to lymph node. PSCs are visualized by the expression of markers  $\alpha$ -SMA (A) and vimentin (B) and the absence of CD31(C).
